# Supplementary figures and images for: Imported Hyalomma Ticks in The Netherlands 2018-2020
Source: Research Square preprint supplement (doi:10.21203/rs.3.rs-267264/v1), 2021-03-03

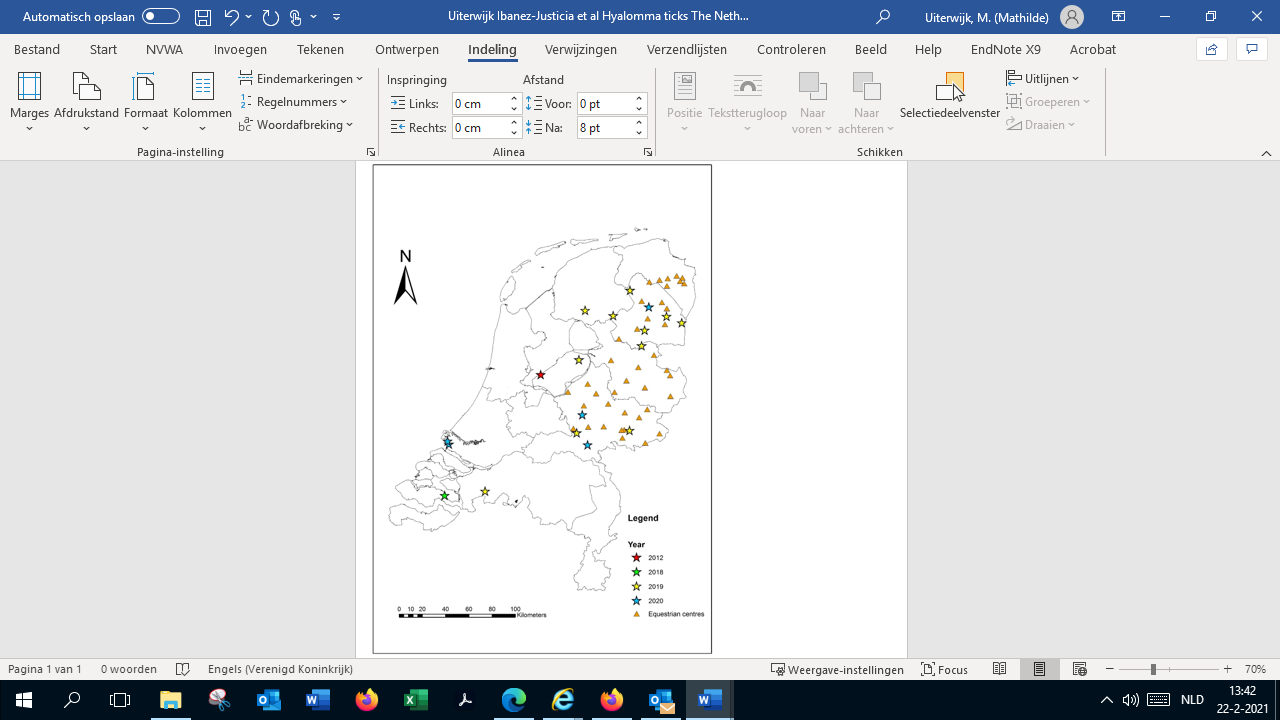

Supplement: Supplementary file 1 [file 5f7d9d1efaa996a25a550344.docx]
